# Supplementary material for: The Pléiades Glacier Observatory: high resolution digital elevation models and ortho-imagery to monitor glacier change
Source: Copernicus journal article supplement (doi:10.5194/egusphere-2024-250), 2024-02-21
Supplement: Supplementary file [file egusphere-2024-250-RC2-supplement.pdf]

# Review of “The Pléiades Glacier Observatory: high resolution digital elevation models and ortho-imagery to monitor glacier change” by Berthier et al.

<https://egusphere.copernicus.org/preprints/2024/egusphere-2024-250/>

David Shean

May 26, 2024

Note: I initially completed a detailed review of the paper on March 20, 2024. Unfortunately, due to a number of factors in professional and personal life, I was unable to complete, and I am only now reviewing notes and finalizing the review on May 26, 2024. I apologize to the editor and authors for the delayed review.

## Summary

This paper documents the Pleiades Glacier Observatory (PGO) program and associated data products providing elevation measurements from 2016-2017 to present for 140 sites, including a sample of ~6810 glaciers spanning nearly all glacierized regions on Earth. The authors provide some background on the program, data collection campaign design (based on community input), and methods used to prepare the datasets (stereo image processing, DEM co-registration, elevation difference correction). The geolocation accuracy of the DEM products is evaluated using external datasets (GLO-30, same-day lidar) and internal repeat measurements. Residual vertical error/uncertainty is evaluated using difference products relative to airborne lidar and repeat PGO DEM measurements over stable terrain, with an assessment of uncertainty reduction from area averaging. A final analysis considers whether the glaciers covered by PGO sites are representative of respective regional glacier mass balance. To accomplish this the authors did not compute mass balance from PGO DEMs, but sampled and aggregated subsets of existing mass balance measurements (Hugonnet et al., 2021) for the glaciers with coverage in the PGO catalog.

Overall, this is a nice paper documenting a valuable resource for the community, and I am eager to see others begin to use the PGO data products moving forward. This publication summarizes nearly a decade of work to establish and maintain the PGO monitoring program, which is no small feat.

In general, my comments are minor, mostly involving suggestions to improve wording, and clear up confusion. I offered several general suggestions and comments around best practices. I hope the authors consider these moving forward, though I do not feel these are essential for publication, and I understand the substantial effort that would be required to reprocess the entire PGO archive before initial release. It's more important to get products out, even if they are not perfect and will be improved in the future.

One of my main questions is whether TC is really the best journal for this paper. This work is relevant to the glaciology and high-mountain cryosphere/hazard communities. But much of the focus is on the data products, including methods and detailed cal/val. There are limited “cryosphere science” results in the paper, which is not a complaint, as I value data/methods papers, but it makes me wonder whether another journal (ESSD?) might be more appropriate?

For an operational observation/monitoring program like this, it is essential to use version-controlled processing and data products for provenance and understanding of potential issues and evolution of the methods (and associated products). Ideally, low-level image products (Level-1B) products would be available, low-level DEM (uncorrected) products, in addition to high-level, co-registered and corrected DEM and difference products. I also wonder about the evolution of the proprietary processing routines used by Airbus to prepare the delivered products over the years (there should at least be version numbers in the metadata that can be tracked) - presumably the current Level-0 to Level-1B processor is better than what was used 10 years ago.

Unfortunately, I was unable to access the “open” data products during my review! I followed the instructions ([https://www.legos.omp.eu/pgo/wp-content/uploads/sites/10/2024/03/Access\\_PGO-DSM\\_v6.pdf](https://www.legos.omp.eu/pgo/wp-content/uploads/sites/10/2024/03/Access_PGO-DSM_v6.pdf)) prepared by the authors, which state “this is when you have to wait delay (up to 7 days!) for your account to be active.” After 3-4 weeks, I still did not have them appear in my account. The different platforms are a bit confusing to navigate (though not suggesting current NASA distribution is necessarily easier). But this “custom approval” approach is really not conducive to supporting new users or easy “on-demand” data access.

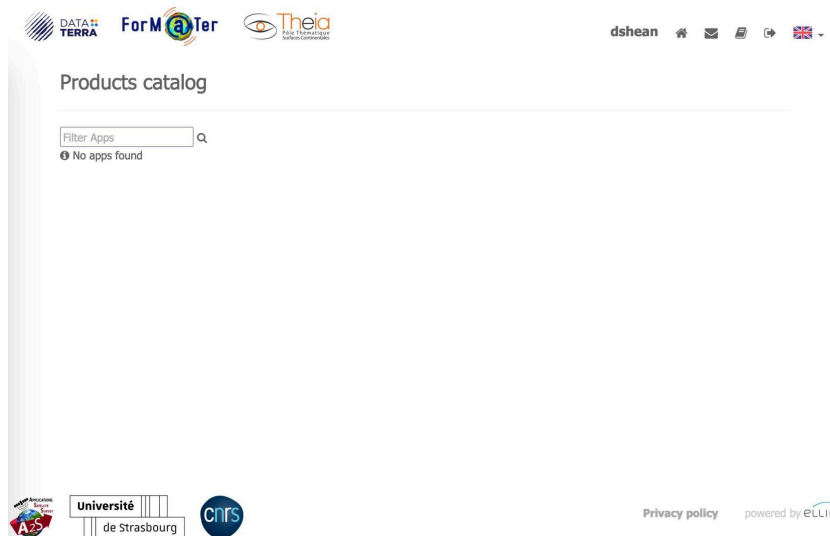

One suggestion - I understand the budget constraints and option to define custom polygons around glaciers of interest for delivery of clipped Level-1B image products, instead of the full Level-1B images (full sensor swath). The “extra” pixels for full-width images, and resulting DEM coverage, would provide a much larger sample of “stable” terrain, which would improve

co-registration and correction beyond the relatively narrow buffer of the clipped products around priority glaciers. Perhaps an arrangement can be made with Airbus to deliver the full Level-1B images for internal processing and correction, but then PGO would only release the clipped DEMs.

## Major comments

88-89: I disagree with the assertion that there is limited value of tri-stereo, esp for steep relief. Also Berthier et al (2014) says “There is a moderate added value of a tri-stereo” not “limited”. Even if glaciers have moderate surface slopes, tri-stereo will provide improved accuracy over the adjacent exposed steep terrain needed for high-quality co-registration results with limited DEM coverage. The tri-stereo also vastly improves relative bundle adjustment for the pair and enables more sophisticated corrections (like three-line-array “jitter” correction). Yes, it may be more expensive, and it may not make sense for the PGO focus (mountain glaciers only) and limited budget, but need to separate these constraints from its inherent value for improved 3D stereo reconstruction in high-relief areas.

Consider reporting the “before” and “after” co-registration metrics over stable surfaces for each DEM - these stats are exported as json from demcoreg, along with a summary png showing DEMs, difference maps, surfaces used, and histograms. The “after” median and nmad stats can be used to provide proxy for the accuracy of each DEM (at least relative to GLO-30)

191-192: Doing co-reg with 20 m DEMs seems fine, but just note that the success depends on the roughness and relief of the scene. If the only available roughness of the surface is at small length scales of ~2-10 m, you want to use the 2 m DEMs. But this is rarely the case for mountain terrain, where significant roughness is present at ~10-1000s of m. I’m confused, however, because the text states that co-registration used 20 m DEMs, but then Figure 6 shows results for the 2 m DEMs, and Figure 5 does not state what was used.

I recommend more careful documentation of which products were used when co-registering a PGO DEM (2 m) to GLO-30 (30 m) vs. comparing two PGO DEMs (both 2 m), and how this might impact results. Fortunately, the Nuth and Kääb slope- and aspect-dependent co-registration approach should perform well for mixed or coarse resolution, as long as there are sufficient distributions of slope and aspect values over static control surfaces (AKA “stable terrain”).

210-221: I don’t understand why a 5th-order polynomial is needed for the cross-track direction, and there is no justification provided here. I just don’t see these artifacts in Figure 4, and I worry about over-fitting and introducing bias over adjacent glaciers from a limited sample. If there is a root cause related to the CCD geometry model in the Pleiades-HR camera model, or systematic “cross-track jitter” during collection of stereo pairs, then that provides justification for high-order polynomial correction, but I’m not sure that’s the case.

229-234: Is a mosaic/composite created for the 2+ DEMs over a single site for a given campaign/year? This strategy of providing many versions of difference maps seems like it could be overwhelming for the user, and the independent co-registration efforts will result in different translations for a given DEM.

Also, in terms of complication/volume - if for a given site, you have 2-3 DEMs at  $t_0$ , 2-3 DEMs at  $t_1$ , that results in potentially 9 difference maps, then x2 for the two resolutions, and x2 for the BM and SGM, so potentially 30+ products 🙄

Personally, I would recommend distribution of the co-registered DEM products, one set of difference maps that you consider the “best,” and then a set of tools that allow users to create and correct their own difference maps from different products if desired.

239-248: Are the observed horizontal CE90 values within the vendor spec of 8.5 m and the stated GLO30 horizontal geolocation accuracy (~4 m if I recall correctly)? I believe the 8.5m CE90 is for off-nadir angles up to 30°.

The systematic +4.5 m northward geolocation error is puzzling. It would be useful to know how the GLO-30 products were processed to “match” the DEM at each site (in local UTM zone, with height above the WGS84 ellipsoid in some ITRF realization (presumably ITRF2014 given acquisition dates) - ideally a version-controlled script in an open repo documenting this.

A map of this error for all PGO sites might reveal latitudinal dependence, distance from UTM zone center (though scaling error within the zone should not introduce errors like this), or some other cause.

Another potential explanation could be related to the sun-synchronous polar orbits and/or more N-S scan direction azimuth - perhaps timing errors or in-track pointing could result in systematic geolocation error, but it seems like Airbus would have caught and fixed this.

While some of the systematic 2.4 m vertical error could be due issues around penetration through snow in the GLO-30 products, I’m suspicious that this could be systematic error in the ASP v3.0 output (note similar vertical bias magnitude for WV/GE documented in Shean et al., 2016 and Fig 4 in Shean et al (2019) PIG paper in TC). This could likely be related to the (implementation and/or lack of) atmospheric refraction and velocity aberration correction for the version of ASP you are running, and/or some of the 2.0 m uncertainty associated with definition of the WGS84 Ensemble (EPSG:4326) vs a specific ITRF/WGS84 realization (e.g., <https://spatialreference.org/ref/epsg/7664/> - see WKT2). Note that the latest ASP includes new, validated refraction/aberration corrections using the USGS Community Sensor Model, and support for PROJ9 and unambiguous output product 3D CRS definitions using WKT2.

256-263: A 30 m threshold for “unreliable” sounds high for image geolocation spec of 8.5 m CE90 combined with GLO-30 geolocation spec of ~4 m.

Ideally, one would mask the GLO-30 products before co-registraiton using the various AUX products containing error estimates and flags for artifacts, though I’m not sure about AUX layer availability for latest GLO-30 products. See example and scripts used to mask the 90-m TanDEM-X products here: <https://github.com/dshean/tandemx>

Earlier, the authors suggest users should use their judgment when evaluating the corrections (including co-registration and systematic bias removal), but here it sounds like there are some automated checks to apply or not apply the co-registration? Or were these checks performed manually? If doing manual review, maybe flag other potentially problematic difference map products. Or as with co-registration, do not apply systematic bias removal (5th order poly, spline) if the resulting output is worse?

Section 3.1.3 needs some tightening - see line-by-line comments.

I was pretty confused when I started reading about PGO mass balance from 2000-2009, since the PGO DEMs don't start until 2016-2017. I suggest more clearly stating that you are not comparing mb measurements from PGO DEMs, but simply re-aggregating Hugonnet et al. results for a subset of glaciers with PGO coverage.

An area coverage threshold of 50% was used to identify PGO glaciers. How was the mean mass balance computed for these glaciers? Hypsometric interpolation? Or just a simple mean for areas with valid coverage, which could be biased if 50% is only over ablation area or only over accumulation area. What happens if you only consider glaciers with 95% more coverage? Do you get the same result?

The question of "Are PGO sites representative of the Earth's glaciers?" is important, but a bit subjective. They could be, but you can also get "the right answer for the wrong reasons" using an independent dataset. I think the more pertinent question for this effort might be "Are PGO mass balance measurements accurate?" I realize that many other papers have demonstrated Pleiades DEMs offer accurate glacier mass balance measurements, but it would have been nice to see some mass balance computed using the available repeat PGO DEMs compared with Hugonnet mass balance from the same period.

What percentage of the PGO glaciers already have 5-year repeat coverage?

The Figure A3 of Berthier et al., in press was cited but not available during review.

## Minor comments

22: Consider "The PGO product consists of freely-available DEMs posted at 2 m..." and deleting the next sentence (maybe too detailed for abstract)

23: Consider "PGO stereo acquisitions began..."

35: Add commas after parenthetical citations for this list

39: Suggest "very-high-resolution (VHR, i.e., sub-meter)"

41: VHR can provide a global *sample*, it just doesn't provide continuous global coverage

57: "airborne laser scanning"

57: I tend to use the term "near-contemporaneous acquisition" but "almost simultaneously" is fine

58: “glaciated” vs. “glacierized”

58: I suggest moving the mention of the number of sites to an earlier sentence “We present the coverage achieved for 140 PGO sites...”

63: I was under the impression that the official mission/instrument name was “Pléiades-HR 1A”

66: In my opinion, the ~20 km swath makes PHR stand out among other VHR platforms with narrow swath widths (~7-13 km). I suggest you mention this here, and the value for sampling many mountain glaciers in “one snapshot”

67: Would be best to list the actual times for a typical stereo pair and triplet geometry. Is it ~30 seconds for the triplet interval? Sounds too short for a pair with expected B/H at 7 km/s.

68: Suggest ASTER VNIR (with acronym definition), as that is the specific instrument name

69: For the record, most modern VHR systems (and medium resolution systems) are 11-12 bits these days. Pleiades is not necessarily unique in this respect.

70: More bits don't necessarily help over textureless surfaces. Suggest removing. More bits help when you have very bright and very dark surfaces in the same scene and a single exposure.

75: Suggest “exceeding” instead of “reaching”

77: Suggest rewording this sentence. There is a global archive, it is just focused on urban areas and other commercial/defense priority targets.

83: Delete “well”

83: In my experience, the saturation is worse for snow-covered, equator-facing slopes in early spring, when solar incidence angles are closer to surface normal

84: check time formatting requirements for TC

87-88: Is the TDI value of 13 for 13 lines? These units are surprising - most other sensors use 8-128 lines of TDI, with  $2^n$  steps

96: I think you're convolving snow cover and snow depth here with “lowest” - the albedo of fresh snow is high, so saturation can be an issue, but a thin layer of snow cover (a few cm) is not a problem for co-registration.

104: The image is not really rejected during tasking, right? Some real-time observations or a forecast model is used to prioritize tasking and if a site is cloudy, no image is acquired.

107: What determines the area of the site? With a 20 km swath, a 100 km<sup>2</sup> image is only 5 km long? I'm guessing these areas refer to some user-defined polygon for the order and delivery of the stereo images.

117: Define GTN-G

118-119: Consider starting the paragraph with a summary sentence about the number of sites and coverage in each region, then talking about details of site selection

120: Check tense in these sections “can” vs. “could” - some of what is reported is based on past decisions, or summarizing what was done and results. But I think the PGO acquisitions are continuing? If so, can continue using present tense throughout.

126: suggest putting “repeat mode” into quotes

142-143: suggest “stereo image pair”

146: remove accents from “stereo-pairs”

147: It would be useful to know more details about how ASP was run (e.g., correlator kernel sizes). This is likely too much detail for this paper, so in addition to the Deschamps-Berger

(2020), maybe best to cite a github repo containing the scripts used to generate the PGO DEMs/orthos (for full open science and version control of PGO products moving forward). I recommend you consider the updated MGM workflow outlined in Bhushan and Shean (<https://zenodo.org/records/4554647>) and Bhushan et al. (J Glac, 2024, soon to be in press, hopefully)?

147: The ASP Earth citation guidelines also recommend citing Shean et al (2016), as this is what is used for Pleiades camera models:

<https://github.com/NeoGeographyToolkit/StereoPipeline?tab=readme-ov-file#citation>

Suggest citing the Zenodo DOI for the specific release rather than a link to the general github page. Note that there have been several important bug fixes and improvements in more recent ASP versions (>4.0). It would be useful to consider upgrading and documenting software version number in the product metadata, rather than freezing to an older ASP version.

150: Should be “Maxar WorldView/GeoEye” recommend including Planet SkySat-C (Bhushan et al., 2021)

151: ASTER is mentioned multiple times earlier in the manuscript without definition of acronym, suggest moving to first location, and specifying VNIR instrument

153: suggest “images” rather than “satellites”

159: “highly-resolved topography” - suggest “enhanced DEM detail/quality and fewer data gaps”

167: “smoother version” for 20 m DEMs - not necessarily. This is just posted on a coarser grid.

176: Earlier, the PAN resolution was stated to be 0.7 m.

176: Do you generate orthoimages from both stereo views, or just the more nadir view? The latter seems like a good compromise, and what most users will want.

Also to clarify, the orthoimages are generated using the original 20-m BM DEM, before any co-registration? This will lead to self-consistent orthoimage, but are you then applying the resulting co-registration translation to the orthoimages? If not, then the ortho and the DEM will not be self-consistent.

The “right” way to do this is to perform a bundle adjustment, align sparse 3D triangulated matches (or an initial dense stereo DEM) to the reference elevation data, then apply the corresponding transformation to the original camera models and rerun stereo processing to create self-consistent DEMs and orthoimages. Not suggesting you need to go back and reprocess, but something consider for the future. Shashank Bhushan’s latest repos include notebooks and scripts following this workflow, and we are working to wrap all of this within ASP to make it easier/faster for the user.

177-180: Could cut sentences about pansharping that you didn’t actually do, so not really relevant.

181: Geolocation performance -> should be clear that this is “The absolute geolocation accuracy”

185: “are” vs. “were” - just double-check tense throughout paper based on what is done, in archive, vs. what is ongoing.

185-186: Cite the specific version of demcoreg using Zenodo DOIs:

<https://zenodo.org/records/7730376>.

Suggest avoiding possessive ‘s after Nuth and Kaab (2011)

185: Include citation for GLO-30 and/or COP30 with documentation at first mention, suggest stating the stated global vertical and horizontal accuracy metrics, and noting that accuracy decreases and there are more artifacts/blunders in steep mountain terrain.

191: Suggest considering “3D translation vector” in this section to distinguish from other co-registration approaches that involve rotation.

197: Maybe consider “product metadata report” or “product quality report” rather than “fact sheet”

206: Suggest changing “again” to something more descriptive about repeat observation for a given site after 5 years

209: Just say “using the demcoreg package, as described above”

212: Rather than “jitter” suggest “unmodeled attitude error (“jitter”)” as there is also “jitter” during TDI, which is what many in the electrical engineering community think when they hear “jitter.” The cause of the triangulated stereo DEM artifacts is attitude error in the metadata of one or both of the primary image products, introducing horizontal and vertical geolocation error in the resulting triangulated point.

215: It would be best to clearly indicate whether figures are showing DEMs from PHR-1A or PHR-1B throughout the text, so we remember that PHR-1B will have larger attitude error artifacts.

220-221: Users should check statistics for residuals after your corrections, and do visual inspection of the difference maps. (I think this is what you are trying to say, but “check the stable terrain” is ambiguous)

229: Suggest “entirely cover a single PGO site in a campaign year” - avoid confusion about repeat coverage.

233-234: How are these stats provided? They are not in the report provided in Appendix 1.

248: Somewhere, should state the geolocation accuracy of GLO-30.

269: “can be interpreted as residual co-registration error”

276: “quality of the PGO DEM co-registration with the reference GLO-30 product”

277: suggest “relative co-registration errors of over 10 m” rather than “residual shifts” as these are relative offsets between your two independently co-registered DEMs. See major comment about masking GLO-30 prior to co-registration - surface relief is only one factor in GLO-30 quality/accuracy.

280: suggest “...three independent airborne lidar campaigns acquired data within less than 1 day of a Pleiades stereo acquisition (Table 2)”

280-281 - Must provide citations for these ALS data (with information on how they were collected and processed), and ideally links to open data archive for the specific products/versions used. I believe these were all ACO products in Canada, not sure about Norway. Details on instrument, altitude, etc will help interpret the observed differences with PGO DEMs over surfaces with variable roughness (e.g., crevasses). While most ALS data should be significantly more accurate/detailed than PGO DEMs, there is a huge range in ALS data quality, often related to instrument specs and processing approach.

282: suggest being clear that there is negligible elevation change over all surfaces in the scenes, including glaciers, snow and exposed terrain. Can consider moving sentence from lines 285-288 here for more continuity.



282-284: I'm glad you pointed out that ALS data has ~0.1 m uncertainty. Note that the ALS errors can (and often will) be much higher than 0.1 m over steep surfaces. I would delete the "Hence the elevation difference directly reflects the uncertainties of the PGO DEMs" as this is not true. You can just say you neglect the ALS error. There is also some unknown lidar penetration in snow/ice depending on grain size and lidar wavelength (which is why we need citations with more information about the ALS data used - Near-IR vs. green)

289: I'm confused here - lidar point clouds are not triangulated. From what I can tell, the authors gridded the lidar point clouds using the ASP point2dem tool with 1 m posting.

288: Since there is another co-registration with lidar, I'm not sure why this is relevant, suggest deleting.

291: Don't need to cite Shean/NuthKaab again (has nothing to do with lidar)

291-293: I'm confused here - the authors just stated that the simultaneous products allow one to look at on-glacier and off-glacier surfaces. Why are they masking here?

293: I don't understand why this bilinear resampling was needed, and this was not mentioned during earlier co-reg with GLO-30 (much larger difference in grid cell size) - the demcoreg tool you use will do this on the fly (bicubic is default).

296-298: I think I understand why updated glacier masks were created manually here (likely better stats), but it's a bit odd to use RGI6 for masking during co-reg and then a different mask for evaluation.

279: Suggest "near-contemporaneous" instead of "simultaneous" - they may be same day, but can have time offset of several hours (potentially significant elevation difference during big melt days)

317: Suggest "As a result of the co-registration process"

319-320: There are clear residual "jitter" artifacts in this PGO DEM in Canada which likely explains most of the observed NMAD.

323-324: I see some "patches" with large apparent elevation difference over crevasses fields and other surfaces where we expect BM to perform poorly compared to SGM. Using NMAD rather than STD here will ignore these "outliers" but depending on application, "superior" is subjective (e.g., if you're studying crevasse dimensions or small-scale roughness, SGM will always be superior)

327-328: While ALS does obtain returns from beneath the canopy, if you are not isolating first/only or ground returns in the ALS point clouds, then ASP is going to produce some weighted average of all available ALS point elevations in each grid cell. You will not end up with a DTM (and I'm not sure that a citation to Piermattei should be included here).

My recommendation would be to mask the vegetation, as this affects your stats, and you need to create a DSM, and need to deal with height percentiles (e.g., 90th percentile) when gridding lidar points for comparison with stereo products. This is tricky, and an important gap that requires more attention from our community in my opinion - ALS is great, but it needs to be carefully processed when used as "truth" for stereo evaluations.

330-332: And to exclude these areas during co-registration. Demcoreg by default only uses slopes within range of 0.1-40°

332: "relief" not "reliefs"

338-339: I'm not sure you can claim "decimetric accuracy" - I interpret that to mean the accuracy is ~0.1 m. The bias is 0.0-0.2 m, and NMAD is 0.3-0.7 m, so combined is potentially closer to ~1 meter. I think "sub-meter" might be more appropriate.

341: "likely facilitate" should be "is required" or "improve" - there's no question that stable terrain is requirement for success

342: Really, it is a matter of the glacier vs. stable terrain area and distribution. If you have a 20x40 km PGO DEM, you can obtain good results for larger glaciers and ice caps. If you're ordering smaller ~100 km<sup>2</sup> images, max glacier size decreases.

343: The earlier section 3.1 is also attempting to estimate "uncertainty of the elevation changes". The first paragraph in this section seems to be using point measurements to do the same thing (validation) as with the lidar analysis?

I think this section is supposed to focus on PGO\_DEM minus PGO\_DEM error, rather than comparing against an external reference? Consider revisiting section heads and organization for how the different evaluations are presented, maybe moving the GNSS paragraph somewhere else (perhaps before the lidar section, since that is also PGO DEM minus external ALS\_DEM)

345: suggest "differential GNSS measurements with centimeter accuracy" rather than "centimetric GNSS measurement"

It's not clear to me why the GNSS measurements can't be used to evaluate the DEM accuracy directly, assuming they are acquired on the same day.

353: Should explicitly state the assumption elevation difference should be 0 over "stable" terrain, and any observed residual is considered error.

375: "peculiar" word choice. "Anomalous" may be more appropriate

375-377: Fine to throw these out if there is a clear threshold or other justification - ties in with earlier comment about thresholds to determine whether co-registration failed.

382: ASTER VNIR

387: If we had two PHR satellites dedicated to glacier observations, or a constellation of shared PHR satellites, it might. But the limited number of available PHR (two) and competition prevents this. In the coming decade, we should have several constellations of VHR imaging satellites capable of stereo.

389: suggest "reasonable assessment of global glacier mass change"

390: include year for Hugonnet citation, and fix other instances in this section

398: "compared these regionally aggregated PGO values with corresponding values using the full sample from Hugonnet et al. (2021)"

399: Given the 2016-2017 start date for PGO, comparing with 2000-2019 values is hard to justify, even if the Hugonnet uncertainty is lowest for the longer time period.

404: "slightly more negative" is used to describe 18% more negative. I'm not sure I would call that "slightly."

404-405: I am not clear on how 2000-2009 mb is measured using PGO DEMs that only begin in 2016.

OK, I now realize what was done here. See major comment about improving language to remove confusion that you are comparing mb from PGO DEMs with mb from Hugonnet et al (2021).

418: "perform even better" - this could be misinterpreted as comparison with external studies. Suggest "and capture temporal evolution"

425: "...more accurate results for mean glacier mass balance" - not to be confused with earlier PGO DEM accuracy evaluation using lidar.

454: I think its important to be clear that you are evaluating calibrated/corrected PGO DEM products, not the original DEMs prepared using original Level-1B metadata

456: I know what you mean by "stable terrain as a proxy of the uncertainty on glaciers" but as written, this doesn't make sense - be clear that the "residual elevation difference values on nearby stable terrain was used to estimate corresponding uncertainty on glacier surfaces"

457: "the mean glacier-wide elevation difference has..." - be clear that this is area average, not just "elevation differences"

458-460: not sure this belongs in conclusions, as it is not discussed at all in the paper, and the focus is not on glacier mass balance. If anything, suggest moving to "discussion" portion of section 4.

## Figures

Suggest redefining all acronyms in figure captions, as readers skimming figures won't necessarily know that BM = Block Matching.

Figure 1: It might be useful/informative to use a color ramp for marker color to signify the number of glaciers covered at each site in the regional panels (earlier it was mentioned that most sites cover dozens of glaciers)

Figure 2: It would be useful to show at least one of the input orthoimages here, so we know *why* there are data gaps - is there a cloud, or is it fresh, textureless snow? Note for future processing, some of the latest recommended ASP MGM options reduce the cross-hatch artifacts shown in 2b.

Figure 3: Not a requirement, but it would be nice to see metrics on errors before and after if you are going to report the translation components in a figure caption.

Figure 4: Suggest rewording caption, as you're not really showing processing steps, rather showing an example of difference map products before and after two corrections. Maybe add titles over each column (something like "Original", "After Co-registration", "After Bias Correction") to make it easier to interpret.

Figure 5: Suggest "The figure shows translation components for the BM DEMs, as the mean and standard deviation for the SGM DEMs were nearly identical"

State whether this was the 2 m or 20 m DEMs

Is the cm unit correct here: "a few tenth of centimeters"? This is "a few mm", no?

Figure 6: See comments about whether figures show 2 or 20 m DEMs.

Figure 7: Not clear which is BM and which is SGM - add titles or modify caption. I think a is BM and b is SGM?

I'm a little surprised by the observed differences between c and d if the only difference is the input PGO DEM using BM (c) vs. SGM (d). This potentially indicates that the independent co-registration approach (co-registering BM to lidar and independently co-registering SGM to

lidar) is introducing bias that could be incorrectly interpreted as due to the correlation approach (or terrain properties).

It would be useful to have one sentence summarizing the “takeaway” message for this figure. Observed elevation differences are near 0, but there are also some artifacts and differences between BM vs SGM products.

Figure 8: Since presenting signed difference values, be clear about which DEM was subtracted from the other. “Difference between” is ambiguous.

Suggest “Points show median and shaded area shows NMAD of dh values within each X m elevation bin (left) and each X degree slope bin (right)”

It’s not completely clear why we would expect a relationship between dh and elevation, unless there are systematic scaling issues in the PGO DEMs. Slope is much more important, and slope and elevation are not independent (i.e., generally, higher slope values at higher elevations in these mountains).

Figure 10: Don’t need ‘s for Hugonnet et al (2021) dataset.

## Tables

Table 1: Suggest moving number of stereo pairs after number of sites. In a single campaign, are there any sites with multiple stereo pairs?

Does the Glacier area column refer to orthoimage coverage or the DEM valid data coverage? The latter should be less due to data gaps from failed correlation.

Table 2: Seems odd to just report the glacier area, as you report stats for on and off glacier. Suggest including the “total area” of intersection used for co-reg/evaluation, and then glacier area.

Suggest include date and time for each collection (see earlier comment about potential melt between stereo and lidar acquisition time offset)

Suggest “Lidar density (pt/m<sup>2</sup>)”

It’s a bit odd to use a non-PGO DEM for this evaluation (which is not reproducible). At least state that the processing used for the non-PGO DEM was identical to PGO DEMs.

Table 4: “balance” singular, not plural. The PGO glaciers (this study) is a bit misleading, as it makes it sounds like you measured mass balance using PGO DEMs. As requested in earlier comments, make sure this is clear.

## Data Availability

468: Suggest “Licensing issues prevent open distribution of primary products and orthoimages. The PGO images are available...”

Have you considered distributing the entire archive through AWS Open Data Registry (like ArcticDEM/REMA) or other on-demand, direct-access cloud provider, rather than the current combination of university portals? The ability to subset and stream from COGs in the cloud is much more efficient than downloading entire products (hence the cloud-optimized GeoTiff 😊)

As requested in a few places, for open science and reproducibility, it would be best to distribute all processing and analysis scripts in a version-controlled public archive, so PGO users can

understand how the products were created, and how the processing has evolved (and whether they should download a new version of their DEM).

#### Appendix 1

Great to see this pdf bundled with each product.

Consider including a context map for the site here in addition to the browse image.

Our team (led by Ben Purinton) is working to centralize scripts

([https://github.com/uw-cryo/asp\\_plot](https://github.com/uw-cryo/asp_plot)) to generate standardized “quality report” pdfs for ASP output. It would be great to work together to develop a community package and integrate within core ASP tools.
